# Supplementary material for: Molecular Characterization, Protein-protein Interaction Network, and Evolution of four Glutathione Peroxidases from <em>Tetrahymena Thermophila</em>
Source: Preprints.org preprint supplement (doi:10.20944/preprints202009.0171.v1), 2020-09-08
Supplement: Supplementary file 1 [file supplementary]

**Table S1:** Gene sequences of GPx (and their accession numbers) used for phylogenetic reconstruction.

| **SPECIES** | **ISOFORM** | **ACCESSION NUMBER** |
| --- | --- | --- |
| *Arabidopsis thaliana* | GPx6 | NM_117229.4 |
| *Chlamydomonas reinhardtii* | GPx1 | AY051144.1 |
| *Chlamydomonas reinhardtii* | GPx5 | XM_001698523.1 |
| *Euplotes crassus* | GPx1 | MMETSP1380-20130617|3253_1 |
| *Euplotes crassus* | GPx2 | FJ440154.1 |
| *Euplotes crassus* | GPx3 | JN872737.1 |
| *Euplotes crassus* | GPx4 | FJ440155.1 |
| *Euplotes harpa* | GPx1 | MMETSP0213-20121227|20483_1 |
| *Euplotes harpa* | GPx2 | MMETSP0213-20121227|20569_1 |
| *Euplotes harpa* | GPx3 | MMETSP0213-20121227|20483_1 |
| *Euplotes harpa* | GPx4 | MMETSP0213-20121227|20569_1 |
| *Euplotes harpa* | GPx5 | MMETSP0213-20121227|13322_1 |
| *Homo sapiens* | GPx4 | BC011836.2 |
| *Homo sapiens* | GPx5 | AJ005277.1 |
| *Paramecium tetraurelia* | GPx2 | XM_001443233.1 |
| *Paramecium tetraurelia* | GPx3 | XM_001423564.1 |
| *Paramecium tetraurelia* | GPx4 | XM_001449625.1 |
| *Paramecium tetraurelia* | GPx5 | XM_001442917.1 |
| *Plasmodium falciparum* | GPx1 | XM_001350492.1 |
| *Tetrahymena thermophila* | GPx1 | XM_001022734.1 |
| *Tetrahymena thermophila* | GPx2 | XM_001031216.4 |
| *Tetrahymena thermophila* | GPx3 | XM_001030317.2 |
| *Tetrahymena thermophila* | GPx4 | XM_001031214.1 |
| *Tetrahymena thermophila* | GPx5 | XM_001031215.1 |
| *Tetrahymena thermophila* | GPx6 | XM_001031213.1 |
| *Tetrahymena thermophila* | GPx7 | XM_001014606.1 |
| *Tetrahymena thermophila* | GPx8 | XM_001014604.1 |
| *Tetrahymena thermophila* | GPx9 | XM_001011054.3 |
| *Tetrahymena thermophila* | GPx10 | XM_012796335.1 |
| *Tetrahymena thermophila* | GPx11 | XM_001020136.1 |
| *Tetrahymena thermophila* | GPx12 | XM_012798148.1 |
