# Supplementary material for: Molecular Characterization, Protein-protein Interaction Network, and Evolution of four Glutathione Peroxidases from <em>Tetrahymena Thermophila</em>
Source: Preprints.org preprint supplement (doi:10.20944/preprints202009.0171.v1), 2020-09-08
Supplement: Supplementary file 3 [file Table S2.docx]

**Table S2.** Primers designed with PRIMER3 and used for RT-PCR

| **ID** | **Primer Forward** | **Primer Reverse** |
| --- | --- | --- |
| TTHERM_00661720 | 5'-ATAGTGGTCTGAGAAAGCTTTTGTTTGCAGG-3' | 5'-CATGTATGAACCATTTACCTCTACCTTCT-3' |
| TTHERM_01099010 | 5'-TTGATGTCAGAGCAATAGACATTGATGGA-3' | 5'-CTGGTTTTCCCTCAGCATTAACT-3' |
| TTHERM_00046090 | 5'-GAGCTGCATGCAAAAAAGCAATTTAGAAG-3' | 5'-GTAGTGGTCTGAGGTTAATCCACAC-3' |
| TTHERM_00046110 | 5'-TAGTTGTGTGCAAAAAAAAGGCTTAGAAT-3’ | 5’-'TCACTACTTTTCCTTCTGGGTCT-3' |
| 17s | 5’-AAATGTTTACTCCCTAAGTCGAACC-3’ | 5’-CCTGAGAAACGGCTACTACAACTAC-3’ |
